# Supplementary material for: nFeS Embedded into Cryogels for High-Efficiency Removal of Cr(VI): From Mechanism to for Treatment of Industrial Wastewater
Source: MDPI journal article supplement (doi:10.3390/gels10010056), 2024-01-11
Supplement: s1 [file s1]

**nFeS Embedded into Cryogels for high efficiency removal of Cr (VI): From  
mechanism to for Treatment of Industrial Wastewater**

Peng Xu <sup>a</sup>, Shaojun Jiang <sup>b\*</sup>

a. School of Environment, South China Normal University, Guangzhou 510006,  
China

b. Institute of Agricultural Resources and Environment, Guangdong Academy of  
Agricultural Sciences, Guangzhou 510640, China

\* Corresponding author: Shaojun Jiang

E-mail address: shaojunj93@163.com (J S. Jiang).

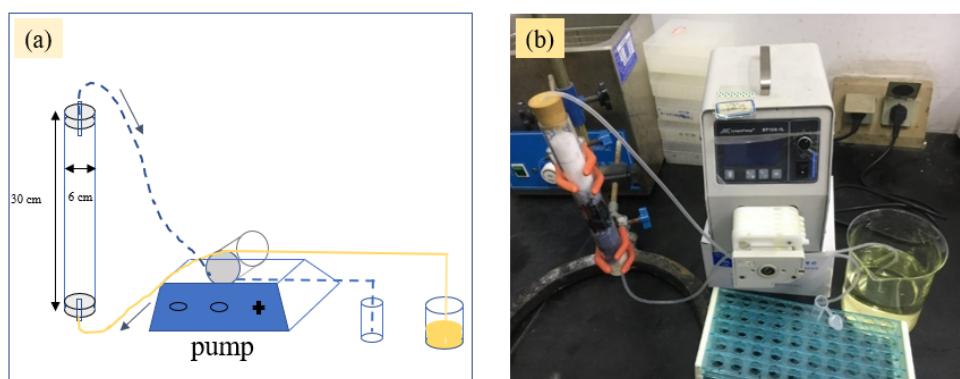

Fig. S1 Column experiments of reaction system.

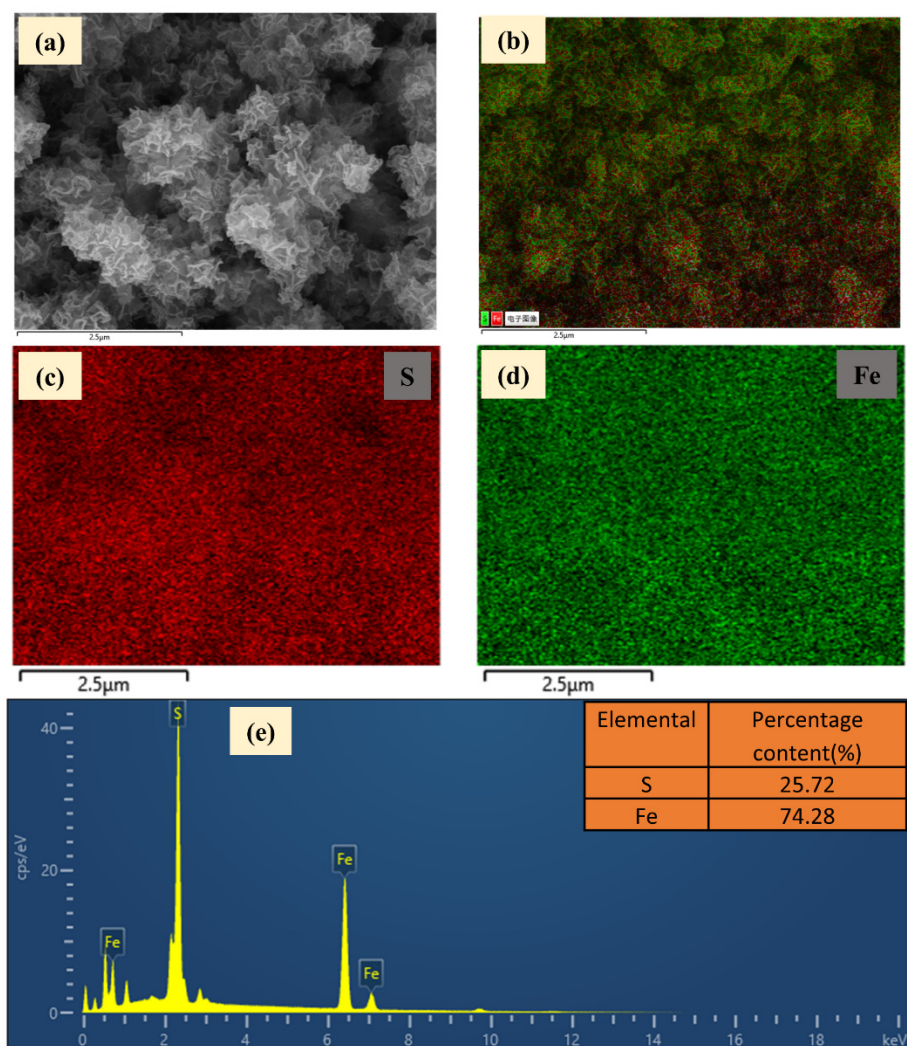

Fig.S2 SEM-EDS elemental mapping images of PSA-nFeS.

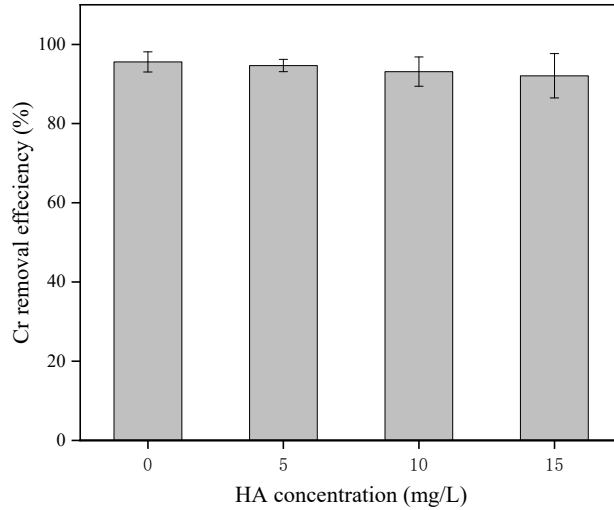

Fig. S3 Effect of Cr(VI) remove capacity of HA

Table S1. Physico-chemical parameters of industrial effluents.

| Parameters             | Tannery effluent | Water quality after reacted |
|------------------------|------------------|-----------------------------|
| pH                     | 4.48             | 5.24                        |
| Turbidity, NTU         | 37               | 1.7                         |
| Total suspended solids | 186.12           | 32                          |
| Sulphate               | 8208             | 1002                        |
| Chloride               | 864.02           | 164.02                      |
| Iron                   | 5.75             | 1.32                        |
| BOD                    | 1935             | -                           |
| COD                    | 9504             | -                           |
| Total chromium (mg/L)  | 767              | 12                          |
| Chromium(VI) (mg/L)    | 52.45            | 0.5                         |

Note: Dilute the mother liquor 10 times as reaction solution. Column experimental reaction parameters: Co (mg/L)=25, Filling doses (g nFeS)=0.056, Q (L/h)=0.54. “-” mean not measured.

Table S2 A comparison of treatment effect for Cr ions by different material

| Material | Mechanisms    | $Q_m$ (mg/g) | References         |
|----------|---------------|--------------|--------------------|
| PSA-nZVI | Reduction and | 128.70       | (Jia et al., 2018) |

|                                                                |                                         |                            |                     |
|----------------------------------------------------------------|-----------------------------------------|----------------------------|---------------------|
|                                                                | adsorption                              |                            |                     |
| PSA-nFeS                                                       | Reduction and adsorption                | 282.43                     | (Ma et al., 2022)   |
| MBC                                                            | adsorption                              | 21.01                      | (Lyu et al., 2023)  |
| HC                                                             | adsorption                              | 125.79                     | (Lin et al., 2023)  |
| RC                                                             | adsorption                              | 100.60                     | (Lin et al., 2023)  |
| Polyethyleneimine-modified hydrochar (PEI-HC)                  | Reduction to Cr(III) and biosorption    | 528.41                     | (Chen et al.,2023)  |
| Ethanol-assisted mechanical activation of zero-valent aluminum | Reduced and precipitated                | 5.23                       | ( Ren et al., 2020) |
| Sewage sludge compost biomass                                  | Reduction to Cr(III) and biosorption    | Cr(VI) 1.87, Cr(III) 34.60 | (Chen et al.,2017)  |
| MXene@MOF                                                      | Adsorption and reduction                | 224.46                     | (Liu et al., 2023)  |
| Bifunctional MOF/Titanate nanotube composites                  | Photocatalysis reduction and adsorption | -                          | (Wang et al., 2019) |

Qm: Maximum sorption capacity for Cr; MBC mean sludge biochar-supported nano-ferrous sulfide; Biochar (RC and HC) were prepared from bagasse by carbonization at 600 °C and 800 °C;

#### References:

Lyu, S L., Liu, T., Wang, X., et al. Removal and mechanism study of Cr(VI) in water by sludge biochar-supported nano-ferrous sulfide . China Environmental Science, 2023,43(8):3935-3945.

Lin, C L., Zhong, L Y., Zhong, X L., et al. Adsorption-reduction reaction

between bagasse-prepared biochar and Cr ( VI ) . Journal of Agro-Environment Science, 2023, 42 ( 10 ): 2335-2345.

Liu, S Y., Han, J C., Ma, D Q., Liu, H X., Fang, M., Tan, X L., MXene@MOF for synergetic removal of Cr(VI) by adsorption and reduction, Colloids and Surfaces A: Physicochemical and Engineering Aspects 678, 5,2023, 132438.

Chen. Z L., Zhang. Y N., Guo. J Z., Chen. L, Li, B., Enhanced removal of Cr(VI) by polyethyleneimine-modified bamboo hydrochar. Environmental Science and Pollution Research, 2023, 30, 94185–94194.

Ren, T. F., Zhang, Y X., Liu, J Q., Zhang, Y Q., Yang, S Y., Ethanol-assisted mechanical activation of zero-valent aluminum for fast and highly efficient removal of Cr(VI). Applied Surface Science. 2020, 533, 15 147543.

Chen, H X., Dou, J F., Xu, H B., (2017) Removal of Cr(VI) ions by sewage sludge compost biomass from aqueous solutions: Reduction to Cr(III) and biosorption. Applied Surface Science.2017, 425, 15, 728-735

Wang, X., Liu, W., Fu, H F., Yi, X H., Wang, P., Zhao, C., Wang, C C., Weiwei Zheng, W W., Simultaneous Cr(VI) reduction and Cr(III) removal of bifunctional MOF/Titanate nanotube composites. Environmental Pollution 2019, 249, 502-511.
